# Supplementary material for: Efficacy, effectiveness, and safety of herpes zoster vaccine in the immunocompetent and immunocompromised subjects: A systematic review and network meta-analysis
Source: PubMed Central journal article supplement (PMC9561817; doi:10.3389/fimmu.2022.978203), 2022-09-30

## Content

|                                                                                                                                 |    |
|---------------------------------------------------------------------------------------------------------------------------------|----|
| Appendix S1: Outcome Definitions. ....                                                                                          | 2  |
| Appendix S2: Literature Search Strategy for PubMed. ....                                                                        | 3  |
| Appendix S3: Grey Literature Sources. ....                                                                                      | 7  |
| Appendix S4: Summary Results of the Cochrane Collaboration Risk of Bias Assessment (n=17 Randomized Controlled Trials). ....    | 8  |
| Appendix S5: Summary Results of the Newcastle-Ottawa Scale Assessment (n=19 Cohort Studies). ....                               | 9  |
| Appendix S6: Risk of bias results. ....                                                                                         | 14 |
| Appendix S7 : Three comparators were included: live attenuated vaccine, adjuvant recombinant subunit vaccine, and placebo. .... | 15 |
| Appendix S8: The funnel plots and publication bias plots. ....                                                                  | 16 |
| Appendix S9: Forest plot of RZV vaccine efficacy by age subgroup. ....                                                          | 25 |
| Appendix S10: Forest plot of ZVL vaccine effectiveness by age subgroup. ....                                                    | 26 |
| Appendix S11: Forest plot of RZV vaccine effectiveness for prevention of HZO. ....                                              | 27 |
| Appendix S12: Safety outcomes of RZV. ....                                                                                      | 28 |
| Appendix S13: Safety outcomes of ZVL. ....                                                                                      | 31 |

## Appendix S1: Outcome Definitions.

| Outcome                           | Definition                                                                                                                                                                                                                                                    |
|-----------------------------------|---------------------------------------------------------------------------------------------------------------------------------------------------------------------------------------------------------------------------------------------------------------|
| Confirmed herpes zoster infection | Subjects who underwent clinical diagnosis of herpes zoster infection through laboratory testing (e.g. polymerase-chain-reaction assay, virus culture) and/or examination by a physician were classified as having confirmed cases of herpes zoster infection. |
| Post-herpetic neuralgia           | Subjects with pain continuing 90 days or longer after the onset of the shingles rash. All efficacy and effectiveness data are based on this definition and also known as PHN-901.                                                                             |
| Herpes zoster ophthalmicus        | Subjects with herpes zoster infection in the ocular region.                                                                                                                                                                                                   |
| Injection site adverse events     | Local reactions such as pain, redness, swelling, induration, pruritus, etc. at the injection site.                                                                                                                                                            |
| Systematic adverse events         | Generalized reactions such as headache, myalgia, fatigue, etc.                                                                                                                                                                                                |
| Serious adverse events            | Any events requiring hospitalization (initial or prolonged) or medical intervention to prevent permanent damage/impairment; resulting in birth defect, disability/permanent damage, death or life-threatening condition <sup>2</sup> .                        |
| Death                             | The number of subjects reported for death regardless of causality.                                                                                                                                                                                            |

1 .Yawn BP. Post-Shingles Neuralgia by Any Definition Is Painful, but Is It PHN? Mayo Clinic Proceedings. 2011;86( 12):1141- 1142. doi:10.4065/mcp.2011.0724.

2. US Food and Drug Administration. What is a Serious Adverse Event? [updated February 1, 2016]. Available from <https://www.fda.gov/Safety/MedWatch/HowToReport/ucm053087.htm> [accessed January 10, 2018].

## Appendix S2: Literature Search Strategy for PubMed.

| Search number | Query                                   | Search Details                                                                                                                                                                                                                                                                                                                                                                                                                                                                                                                                     | Results   |
|---------------|-----------------------------------------|----------------------------------------------------------------------------------------------------------------------------------------------------------------------------------------------------------------------------------------------------------------------------------------------------------------------------------------------------------------------------------------------------------------------------------------------------------------------------------------------------------------------------------------------------|-----------|
| 1             | randomized controlled trial [pt]        | "randomized controlled trial"[Publication Type]                                                                                                                                                                                                                                                                                                                                                                                                                                                                                                    | 564,201   |
| 2             | controlled clinical trial [pt]          | "controlled clinical trial"[Publication Type]                                                                                                                                                                                                                                                                                                                                                                                                                                                                                                      | 654,086   |
| 3             | randomized [tiab]                       | "randomized"[Title/Abstract]                                                                                                                                                                                                                                                                                                                                                                                                                                                                                                                       | 605,081   |
| 4             | placebo [tiab]                          | "placebo"[Title/Abstract]                                                                                                                                                                                                                                                                                                                                                                                                                                                                                                                          | 233,312   |
| 5             | trial [tiab]                            | "trial"[Title/Abstract]                                                                                                                                                                                                                                                                                                                                                                                                                                                                                                                            | 699,406   |
| 6             | randomly [tiab]                         | "randomly"[Title/Abstract]                                                                                                                                                                                                                                                                                                                                                                                                                                                                                                                         | 379,944   |
| 7             | groups [tiab]                           | "groups"[Title/Abstract]                                                                                                                                                                                                                                                                                                                                                                                                                                                                                                                           | 2,362,600 |
| 8             | # 1 OR #2 OR #3 OR #4 OR #5 OR #6 OR #7 |                                                                                                                                                                                                                                                                                                                                                                                                                                                                                                                                                    | 3,442,937 |
| 9             | animals [mh] NOT humans [mh]            | "animals"[MeSH Terms] NOT "humans"[MeSH Terms]                                                                                                                                                                                                                                                                                                                                                                                                                                                                                                     | 4,979,947 |
| 10            | #8 NOT #9                               |                                                                                                                                                                                                                                                                                                                                                                                                                                                                                                                                                    | 2,956,001 |
| 11            | herpes zoster                           | "herpes zoster"[MeSH Terms] OR ("herpes"[All Fields] AND "zoster"[All Fields]) OR "herpes zoster"[All Fields]                                                                                                                                                                                                                                                                                                                                                                                                                                      | 18,695    |
| 12            | shingles                                | "herpes zoster"[MeSH Terms] OR ("herpes"[All Fields] AND "zoster"[All Fields]) OR "herpes zoster"[All Fields] OR "shingles"[All Fields] OR "shingle"[All Fields]                                                                                                                                                                                                                                                                                                                                                                                   | 19,184    |
| 13            | varicella zoster virus                  | "herpesvirus 3, human"[MeSH Terms] OR "human herpesvirus 3"[All Fields] OR ("varicella"[All Fields] AND "zoster"[All Fields] AND "virus"[All Fields]) OR "varicella zoster virus"[All Fields]                                                                                                                                                                                                                                                                                                                                                      | 12,306    |
| 14            | zoster                                  | "herpes zoster"[MeSH Terms] OR ("herpes"[All Fields] AND "zoster"[All Fields]) OR "herpes zoster"[All Fields] OR "zoster"[All Fields]                                                                                                                                                                                                                                                                                                                                                                                                              | 22,871    |
| 15            | # 11 OR # 12 OR # 13 OR # 14            |                                                                                                                                                                                                                                                                                                                                                                                                                                                                                                                                                    | 24,321    |
| 16            | vaccine                                 | "vaccin"[Supplementary Concept] OR "vaccin"[All Fields] OR "vaccination"[MeSH Terms] OR "vaccination"[All Fields] OR "vaccinable"[All Fields] OR "vaccinal"[All Fields] OR "vaccinate"[All Fields] OR "vaccinated"[All Fields] OR "vaccinates"[All Fields] OR "vaccinating"[All Fields] OR "vaccinations"[All Fields] OR "vaccination s"[All Fields] OR "vaccinator"[All Fields] OR "vaccinators"[All Fields] OR "vaccine s"[All Fields] OR "vaccined"[All Fields] OR "vaccines"[MeSH Terms] OR "vaccines"[All Fields] OR "vaccine"[All Fields] OR | 449,444   |

|    |                       |                                                                                                                                                                                                                                                                                                                                                                                                                                                                                                                                                                                                                                                                                                                     |           |
|----|-----------------------|---------------------------------------------------------------------------------------------------------------------------------------------------------------------------------------------------------------------------------------------------------------------------------------------------------------------------------------------------------------------------------------------------------------------------------------------------------------------------------------------------------------------------------------------------------------------------------------------------------------------------------------------------------------------------------------------------------------------|-----------|
|    |                       | "vaccins"[All Fields]                                                                                                                                                                                                                                                                                                                                                                                                                                                                                                                                                                                                                                                                                               |           |
| 17 | vaccination           | "vaccin"[Supplementary Concept] OR "vaccin"[All Fields] OR "vaccination"[MeSH Terms] OR "vaccination"[All Fields] OR "vaccinable"[All Fields] OR "vaccinal"[All Fields] OR "vaccinate"[All Fields] OR "vaccinated"[All Fields] OR "vaccinates"[All Fields] OR "vaccinating"[All Fields] OR "vaccinations"[All Fields] OR "vaccination s"[All Fields] OR "vaccinator"[All Fields] OR "vaccinators"[All Fields] OR "vaccine s"[All Fields] OR "vaccined"[All Fields] OR "vaccines"[MeSH Terms] OR "vaccines"[All Fields] OR "vaccine"[All Fields] OR "vaccins"[All Fields]                                                                                                                                            | 449,444   |
| 18 | immunization          | "immune"[All Fields] OR "immuned"[All Fields] OR "immunes"[All Fields] OR "immunisation"[All Fields] OR "vaccination"[MeSH Terms] OR "vaccination"[All Fields] OR "immunization"[All Fields] OR "immunization"[MeSH Terms] OR "immunisations"[All Fields] OR "immunizations"[All Fields] OR "immunise"[All Fields] OR "immunised"[All Fields] OR "immuniser"[All Fields] OR "immunisers"[All Fields] OR "immunising"[All Fields] OR "immunities"[All Fields] OR "immunity"[MeSH Terms] OR "immunity"[All Fields] OR "immunization s"[All Fields] OR "immunize"[All Fields] OR "immunized"[All Fields] OR "immunizer"[All Fields] OR "immunizers"[All Fields] OR "immunizes"[All Fields] OR "immunizing"[All Fields] | 1,424,649 |
| 19 | # 16 OR # 17 OR # 18  |                                                                                                                                                                                                                                                                                                                                                                                                                                                                                                                                                                                                                                                                                                                     | 1,567,762 |
| 20 | herpes zoster vaccine | "herpes zoster vaccine"[MeSH Terms] OR ("herpes"[All Fields] AND "zoster"[All Fields] AND "vaccine"[All Fields]) OR "herpes zoster vaccine"[All Fields]                                                                                                                                                                                                                                                                                                                                                                                                                                                                                                                                                             | 2,381     |
| 21 | zoster vaccine        | "herpes zoster vaccine"[MeSH Terms] OR ("herpes"[All Fields] AND "zoster"[All Fields] AND "vaccine"[All Fields]) OR "herpes zoster vaccine"[All Fields] OR ("zoster"[All Fields] AND "vaccine"[All Fields]) OR "zoster vaccine"[All Fields]                                                                                                                                                                                                                                                                                                                                                                                                                                                                         | 3,277     |
| 22 | shingrix              | "glycoprotein e varicella zoster virus"[Supplementary Concept] OR "glycoprotein e varicella zoster virus"[All Fields] OR "varicella zoster virus glycoprotein e"[All Fields] OR "shingrix"[All Fields]                                                                                                                                                                                                                                                                                                                                                                                                                                                                                                              | 274       |
| 23 | zostavax              | "herpes zoster vaccine"[MeSH Terms] OR ("herpes"[All Fields] AND "zoster"[All Fields] AND "vaccine"[All Fields]) OR "herpes zoster vaccine"[All Fields] OR                                                                                                                                                                                                                                                                                                                                                                                                                                                                                                                                                          | 2,396     |

|    |                                 |                                                                                                                                                                                                                                                                                                                                                                                                                                                                    |            |
|----|---------------------------------|--------------------------------------------------------------------------------------------------------------------------------------------------------------------------------------------------------------------------------------------------------------------------------------------------------------------------------------------------------------------------------------------------------------------------------------------------------------------|------------|
|    |                                 | "zostavax"[All Fields]                                                                                                                                                                                                                                                                                                                                                                                                                                             |            |
| 24 | #20 OR #21 OR #22 OR #23        |                                                                                                                                                                                                                                                                                                                                                                                                                                                                    | 3,415      |
| 25 | # 15 AND # 19                   |                                                                                                                                                                                                                                                                                                                                                                                                                                                                    | 6,834      |
| 26 | #24 OR #25                      |                                                                                                                                                                                                                                                                                                                                                                                                                                                                    | 6,947      |
| 27 | cohort analysis                 | "cohort studies"[MeSH Terms] OR ("cohort"[All Fields] AND "studies"[All Fields]) OR "cohort studies"[All Fields] OR ("cohort"[All Fields] AND "analysis"[All Fields]) OR "cohort analysis"[All Fields]                                                                                                                                                                                                                                                             | 2,488,563  |
| 28 | longitudinal study              | "longitudinal studies"[MeSH Terms] OR ("longitudinal"[All Fields] AND "studies"[All Fields]) OR "longitudinal studies"[All Fields] OR ("longitudinal"[All Fields] AND "study"[All Fields]) OR "longitudinal study"[All Fields]                                                                                                                                                                                                                                     | 305,607    |
| 29 | retrospective cohort            | ("retrospective studies"[MeSH Terms] OR ("retrospective"[All Fields] AND "studies"[All Fields]) OR "retrospective studies"[All Fields] OR "retrospective"[All Fields] OR "retrospectively"[All Fields] OR "retrospectives"[All Fields]) AND ("cohort studies"[MeSH Terms] OR ("cohort"[All Fields] AND "studies"[All Fields]) OR "cohort studies"[All Fields] OR "cohort"[All Fields] OR "cohort s"[All Fields] OR "cohorte"[All Fields] OR "cohorts"[All Fields]) | 1,071,163  |
| 30 | prospective cohort              | ("longitudinal studies"[MeSH Terms] OR ("longitudinal"[All Fields] AND "studies"[All Fields]) OR "longitudinal studies"[All Fields] OR "prospective"[All Fields] OR "prospectively"[All Fields]) AND ("cohort studies"[MeSH Terms] OR ("cohort"[All Fields] AND "studies"[All Fields]) OR "cohort studies"[All Fields] OR "cohort"[All Fields] OR "cohort s"[All Fields] OR "cohorte"[All Fields] OR "cohorts"[All Fields])                                        | 890,209    |
| 31 | cohort study                    | "cohort studies"[MeSH Terms] OR ("cohort"[All Fields] AND "studies"[All Fields]) OR "cohort studies"[All Fields] OR ("cohort"[All Fields] AND "study"[All Fields]) OR "cohort study"[All Fields]                                                                                                                                                                                                                                                                   | 2,545,673  |
| 32 | #27 OR #28 OR #29 OR #30 OR #31 |                                                                                                                                                                                                                                                                                                                                                                                                                                                                    | 2,672,873  |
| 33 | #26 AND #32                     |                                                                                                                                                                                                                                                                                                                                                                                                                                                                    | 1,004      |
| 34 | effectiveness                   | "effect"[All Fields] OR "effecting"[All Fields] OR "effective"[All Fields] OR "effectively"[All Fields] OR "effectiveness"[All Fields] OR "effectivenesses"[All Fields] OR "effectives"[All Fields] OR "effectivities"[All Fields] OR "effectivity"[All Fields] OR "effects"[All Fields]                                                                                                                                                                           | 10,378,764 |
| 35 | #33 AND #34                     |                                                                                                                                                                                                                                                                                                                                                                                                                                                                    | 416        |

|    |                                                                       |                                           |            |
|----|-----------------------------------------------------------------------|-------------------------------------------|------------|
| 36 | ("1960/01/01"[Date - Publication] : "2022/01/31"[Date - Publication]) | 1960/01/01:2022/01/31[Date - Publication] | 32,033,207 |
| 37 | #35 AND #36                                                           |                                           | 413        |
| 38 | # 10 AND #26                                                          |                                           | 1,014      |
| 39 | #38 AND #36                                                           |                                           | 997        |
| 40 | #37 OR #39                                                            |                                           | 1282       |

## **Appendix S3: Grey Literature Sources.**

### **1) Trial registries:**

Biomed Central. ISRCTN Registry: <http://www.isrctn.com/>

National Institute of Medical Statistics, Indian Council of Medical Research. Clinical Trials Registry - India (CTRI): <http://ctri.nic.in/Clinicaltrials/advancesearchmain.php>

US National Institutes of Health. ClinicalTrials.gov:  
<http://clinicaltrials.gov/ct/screen/AdvancedSearch>

Thomson CenterWatch. CenterWatch Clinical Trials Listing Service:  
<http://www.centerwatch.com/clinical-trials/listings/>

### **2) General grey databases:**

GreyNet International: <http://www.greylit.org>

SIGLE (System for Information on Grey Literature in Europe): <http://www.opengrey.eu>

### **3) International databases:**

Agency for Healthcare Research and Quality:  
<http://www.ahrq.gov/research/index.html>

LILACS - Latin- American and Caribbean Center on Health Sciences Information:  
<http://lilacs.bvsalud.org/en/>

WHO (WHOLIS):  
<http://disei.who.int/uhtbin/cgiirsi/Tue+Apr++5+17:45:43+MEST+2016/0/49>

### **4) Theses and dissertations:**

DART-Europe E-theses Portal: <http://www.dart-europe.eu/basic-search.php>

Electronic Theses Online Service (ETHOS) | British Library:  
<http://ethos.bl.uk/Home.do;jsessionid=D96E9CF245B0FE0199DDDB94FF4BD2A7>

Open access dissertations: <https://oatd.org>

Thesis Canada Portal: <http://www.bac-lac.gc.ca/eng/services/theses/Pages/theses-canada.aspx>





**Appendix S5: Summary Results of the Newcastle-Ottawa Scale Assessment (n=19 Cohort Studies).**

| Study                                                                                                                       |                     | SELECTION                                |                                     |                           |                                                                          | COMPARABILITY                                                   | OUTCOME               |                                                 |                                  | Total scores |
|-----------------------------------------------------------------------------------------------------------------------------|---------------------|------------------------------------------|-------------------------------------|---------------------------|--------------------------------------------------------------------------|-----------------------------------------------------------------|-----------------------|-------------------------------------------------|----------------------------------|--------------|
|                                                                                                                             |                     | Representativeness of the Exposed Cohort | Selection of the Non-Exposed Cohort | Ascertainment of Exposure | Demonstration That Outcome of Interest Was Not Present at Start of Study | Comparability of Cohorts on the Basis of the Design or Analysis | Assessment of Outcome | Was Follow-Up Long Enough for Outcomes to Occur | Adequacy of Follow Up of Cohorts |              |
| Recombinant Zoster Vaccine (Shingrix): Real-World Effectiveness in the First 2 Years Post-Licensure                         | Izurieta, H. S.2021 | 1                                        | 1                                   | 1                         | 1                                                                        | 2                                                               | 1                     | 1                                               | 1                                | 9            |
| Effectiveness of the Recombinant Zoster Vaccine for Herpes Zoster Ophthalmicus in the United States                         | Lu, A.2021          | 1                                        | 1                                   | 1                         | 1                                                                        | 2                                                               | 1                     | 1                                               | 1                                | 9            |
| Effectiveness of the recombinant zoster vaccine among Kaiser Permanente Hawaii enrollees aged 50 and older: A retrospective | Sun, Y.2021         | 1                                        | 1                                   | 1                         | 1                                                                        | 2                                                               | 1                     | 1                                               | 1                                | 9            |

|                                                                                                                                                              |                   |   |   |   |   |   |   |   |   |   |   |
|--------------------------------------------------------------------------------------------------------------------------------------------------------------|-------------------|---|---|---|---|---|---|---|---|---|---|
| cohort study                                                                                                                                                 |                   |   |   |   |   |   |   |   |   |   |   |
| Effectiveness of the Recombinant Zoster Vaccine in Adults Aged 50 and Older in the United States: A Claims-Based Cohort Study                                | Sun, Y.2021       | 1 | 1 | 1 | 1 | 2 | 1 | 1 | 1 | 1 | 9 |
| Herpes Zoster Vaccine in Older Adults and the Risk of Subsequent Herpes Zoster Disease                                                                       | Tseng, H. F.2011  | 1 | 1 | 1 | 1 | 2 | 1 | 1 | 1 | 1 | 9 |
| The use, safety, and effectiveness of herpes zoster vaccination in individuals with inflammatory and autoimmune diseases: a longitudinal observational study | Zhang, J.2011     | 0 | 1 | 1 | 1 | 1 | 1 | 1 | 1 | 1 | 7 |
| Herpes Zoster Vaccine Effectiveness against Incident Herpes Zoster and Post-herpetic Neuralgia in an Older US Population: A Cohort Study                     | Langan, S. M.2013 | 1 | 1 | 1 | 1 | 2 | 1 | 1 | 1 | 1 | 9 |
| Vaccination Against Zoster                                                                                                                                   | Tseng, H.         | 1 | 1 | 1 | 1 | 2 | 1 | 1 | 1 | 1 | 9 |

|                                                                                                                                                   |                        |   |   |   |   |   |   |   |   |   |  |
|---------------------------------------------------------------------------------------------------------------------------------------------------|------------------------|---|---|---|---|---|---|---|---|---|--|
| Remains Effective in Older Adults Who Later Undergo Chemotherapy                                                                                  | F.2014                 |   |   |   |   |   |   |   |   |   |  |
| Declining Effectiveness of Herpes Zoster Vaccine in Adults Aged $\geq 60$ Years                                                                   | Tseng, H.<br>F.2016    | 1 | 1 | 1 | 1 | 2 | 1 | 1 | 1 | 9 |  |
| Effectiveness of Herpes Zoster Vaccine in Patients 60 Years and Older With End-stage Renal Disease                                                | Tseng, H.<br>F.2016    | 1 | 1 | 1 | 1 | 2 | 1 | 1 | 1 | 9 |  |
| Effectiveness and Duration of Protection Provided by the Live-attenuated Herpes Zoster Vaccine in the Medicare Population Ages 65 Years and Older | Izurieta, H.<br>S.2017 | 1 | 1 | 1 | 1 | 2 | 1 | 1 | 1 | 9 |  |
| Assessing the effectiveness of zoster vaccine live: A retrospective cohort study using primary care data in the United Kingdom                    | Matthews,<br>I.2018    | 1 | 1 | 1 | 1 | 2 | 1 | 1 | 1 | 9 |  |
| Effectiveness of herpes zoster vaccination in an older United Kingdom population                                                                  | Walker, J.<br>L.2018   | 0 | 1 | 1 | 1 | 2 | 1 | 1 | 1 | 8 |  |
| Effectiveness of the herpes                                                                                                                       | Blom,                  | 0 | 1 | 1 | 1 | 2 | 1 | 1 | 1 | 8 |  |

|                                                                                                                                      |                      |   |   |   |   |   |   |   |   |   |  |
|--------------------------------------------------------------------------------------------------------------------------------------|----------------------|---|---|---|---|---|---|---|---|---|--|
| zoster vaccine Zostavax®<br>in Stockholm County,<br>Sweden                                                                           | K.2019               |   |   |   |   |   |   |   |   |   |  |
| Long-term effectiveness of<br>zoster vaccine live for<br>postherpetic neuralgia<br>prevention                                        | Klein, N.<br>P.2019  | 1 | 1 | 1 | 1 | 2 | 1 | 1 | 1 | 9 |  |
| Effectiveness of the<br>live-attenuated herpes<br>zoster vaccine 2 years after<br>its introduction in Australia                      | Lin, J.2021          | 0 | 1 | 1 | 1 | 2 | 1 | 0 | 1 | 7 |  |
| Longterm Effectiveness of<br>Herpes Zoster Vaccine<br>among Patients with<br>Autoimmune and<br>Inflammatory Diseases                 | Yun,<br>H.2017       | 1 | 1 | 1 | 1 | 0 | 1 | 1 | 1 | 7 |  |
| Risk factors for modified<br>vaccine effectiveness of the<br>live attenuated zoster<br>vaccine among the elderly<br>in England       | Bollaerts,<br>K.2019 | 1 | 1 | 1 | 1 | 2 | 1 | 1 | 1 | 9 |  |
| Association between<br>vaccination for herpes<br>zoster and risk of herpes<br>zoster infection among<br>older patients with selected | Zhang,<br>J.2012     | 1 | 1 | 1 | 1 | 2 | 1 | 1 | 1 | 9 |  |



## Appendix S6: Risk of bias results.

Four of the 17 included randomized controlled trials had unclear risk of bias from inadequate reporting of random sequence generation (23%) and 5 from inadequate reporting of allocation concealment (29%). In addition, 8 studies had a high risk of “other” biases (47%).

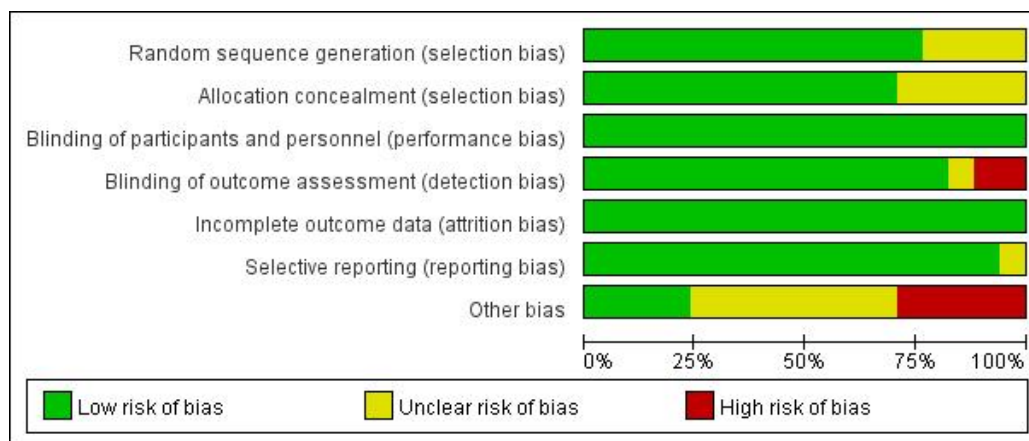

| Study   | Random sequence generation (selection bias) | Allocation concealment (selection bias) | Blinding of participants and personnel (performance bias) | Blinding of outcome assessment (detection bias) | Incomplete outcome data (attrition bias) | Selective reporting (reporting bias) | Other bias |
|---------|---------------------------------------------|-----------------------------------------|-----------------------------------------------------------|-------------------------------------------------|------------------------------------------|--------------------------------------|------------|
| RC 2013 | +                                           | +                                       | +                                                         | +                                               | +                                        | +                                    | +          |
| PV 2020 | +                                           | ?                                       | +                                                         | +                                               | +                                        | +                                    | ?          |
| PV 2019 | +                                           | +                                       | +                                                         | +                                               | +                                        | +                                    | +          |
| MO 2005 | ?                                           | ?                                       | +                                                         | +                                               | +                                        | +                                    | +          |
| MG 2018 | ?                                           | ?                                       | +                                                         | +                                               | +                                        | +                                    | ?          |
| KS 2012 | +                                           | +                                       | +                                                         | +                                               | +                                        | +                                    | +          |
| JV 2012 | +                                           | +                                       | +                                                         | +                                               | +                                        | +                                    | +          |
| HL 2015 | +                                           | ?                                       | +                                                         | +                                               | +                                        | +                                    | +          |
| ES 2014 | +                                           | +                                       | +                                                         | +                                               | +                                        | +                                    | ?          |
| EB 2015 | ?                                           | +                                       | +                                                         | +                                               | +                                        | +                                    | ?          |
| CM 2019 | +                                           | +                                       | +                                                         | +                                               | +                                        | +                                    | +          |
| CB 2018 | +                                           | ?                                       | +                                                         | +                                               | +                                        | +                                    | ?          |
| AR 2015 | +                                           | ?                                       | +                                                         | +                                               | +                                        | +                                    | +          |
| AM 2011 | ?                                           | +                                       | +                                                         | +                                               | +                                        | +                                    | +          |
| AD 2019 | +                                           | +                                       | +                                                         | +                                               | +                                        | +                                    | +          |
| AC 2016 | +                                           | +                                       | +                                                         | +                                               | +                                        | +                                    | ?          |
| AB 2019 | +                                           | +                                       | +                                                         | +                                               | +                                        | +                                    | +          |

**Appendix S7 :Three comparators were included: live attenuated vaccine, adjuvant recombinant subunit vaccine, and placebo.**

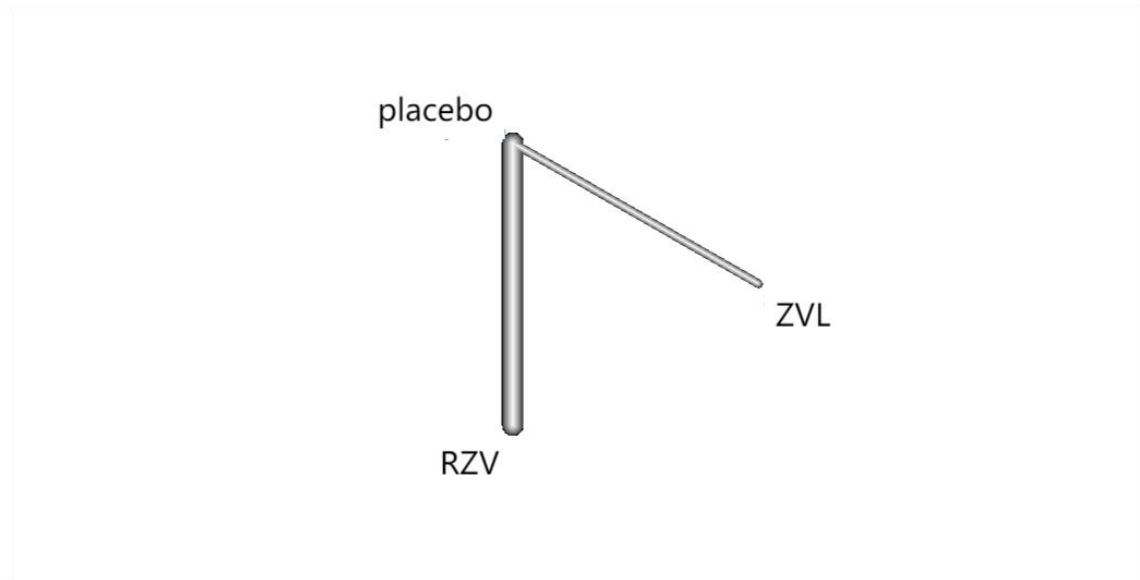

## Appendix S8: The funnel plots and publication bias plots.

### RZV

#### Injection sites

Redness:

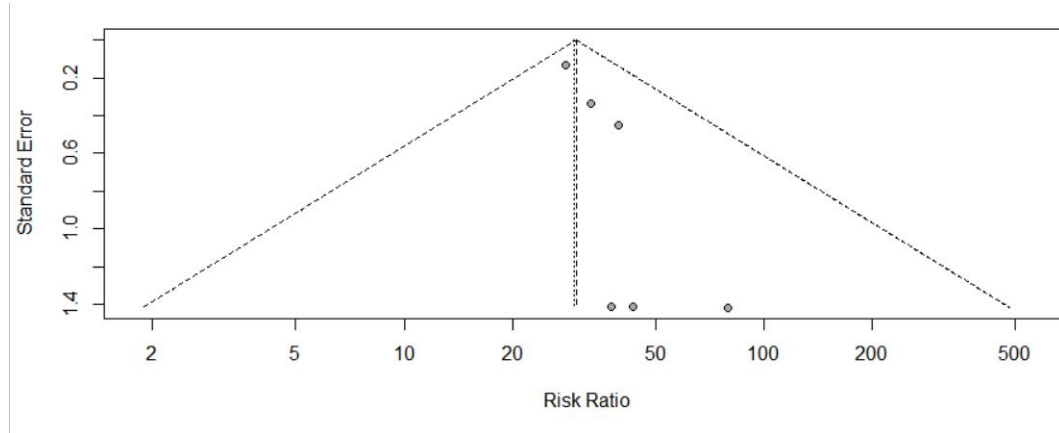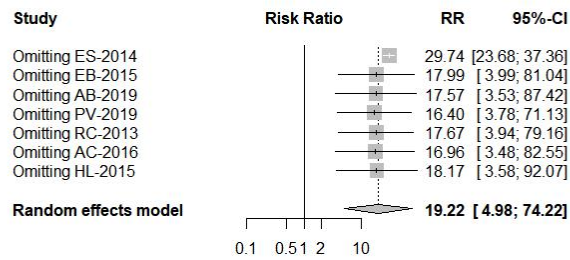

Swelling:

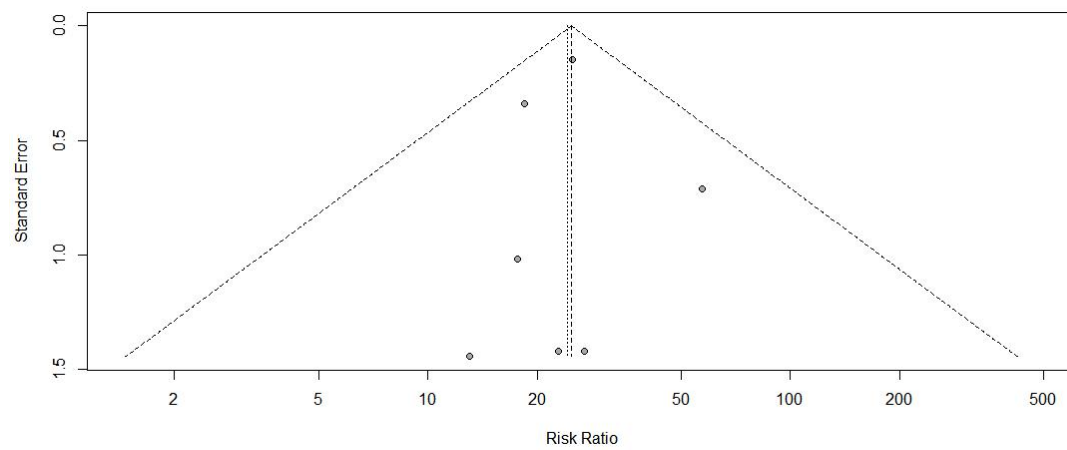



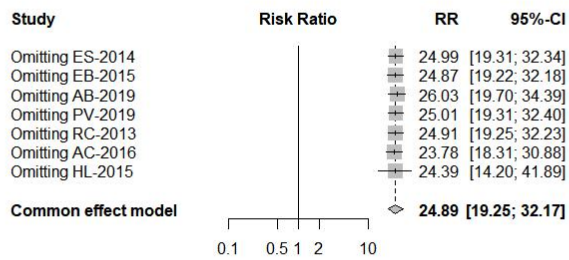

Pain:

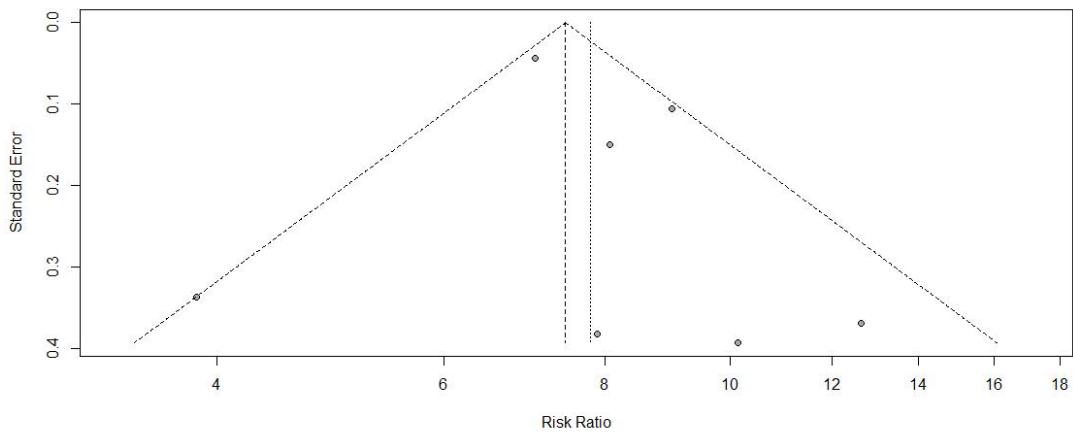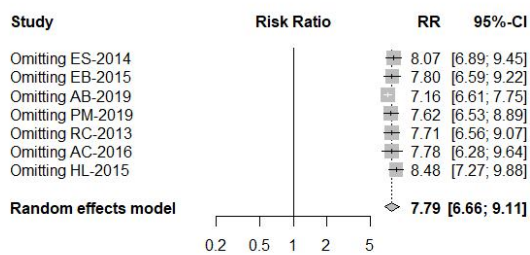

**Systemic adverse events**

Fatigue:

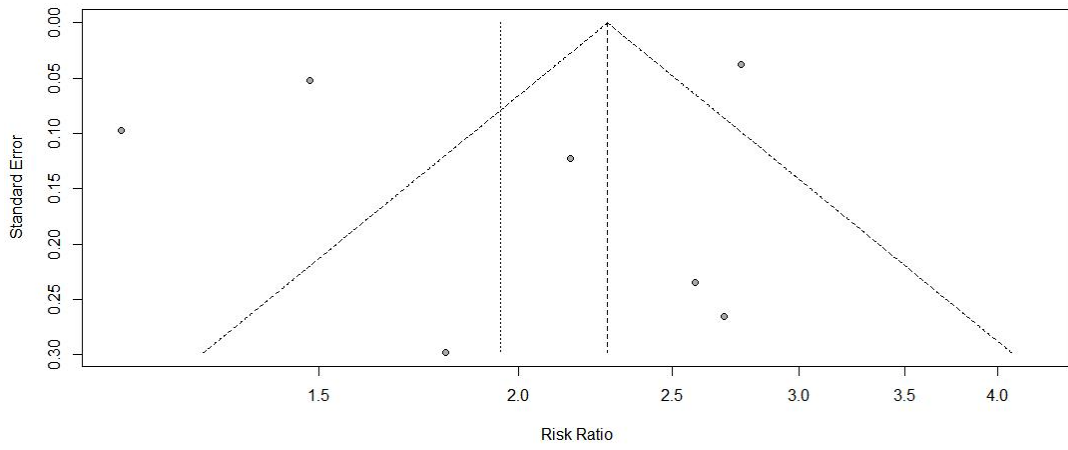

| Study                       | Risk Ratio  | RR          | 95%-CI              |
|-----------------------------|-------------|-------------|---------------------|
| Omitting ES-2014            | 8.07        | 8.07        | [6.89; 9.45]        |
| Omitting EB-2015            | 7.80        | 7.80        | [6.59; 9.22]        |
| Omitting AB-2019            | 7.16        | 7.16        | [6.61; 7.75]        |
| Omitting PM-2019            | 7.62        | 7.62        | [6.53; 8.89]        |
| Omitting RC-2013            | 7.71        | 7.71        | [6.56; 9.07]        |
| Omitting AC-2016            | 7.78        | 7.78        | [6.28; 9.64]        |
| Omitting HL-2015            | 8.48        | 8.48        | [7.27; 9.88]        |
| <b>Random effects model</b> | <b>7.79</b> | <b>7.79</b> | <b>[6.66; 9.11]</b> |

0.2 0.5 1 2 5

### Myalgia:

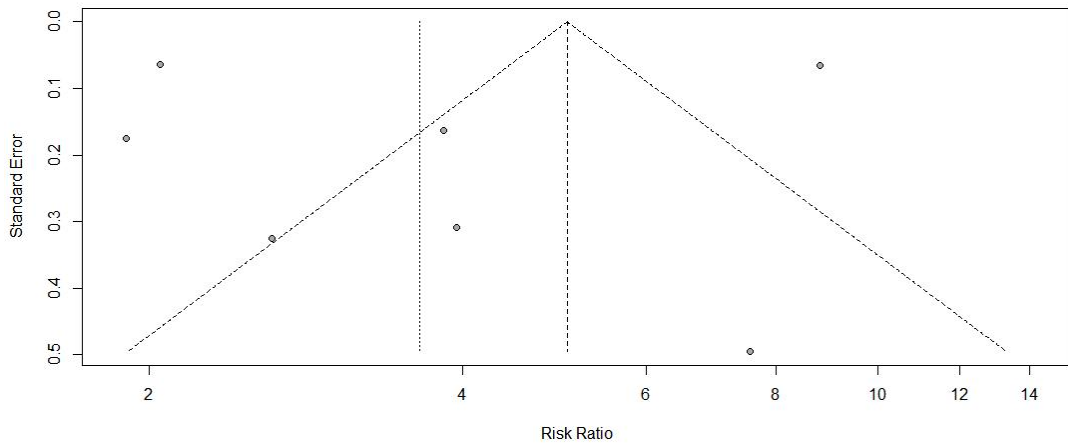

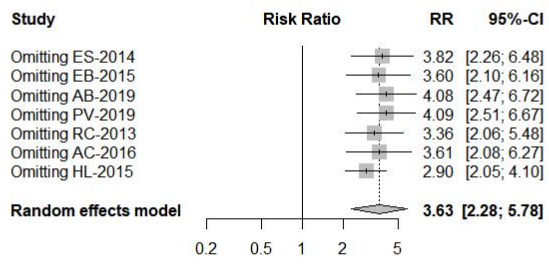

Gastrointestinal symptoms:

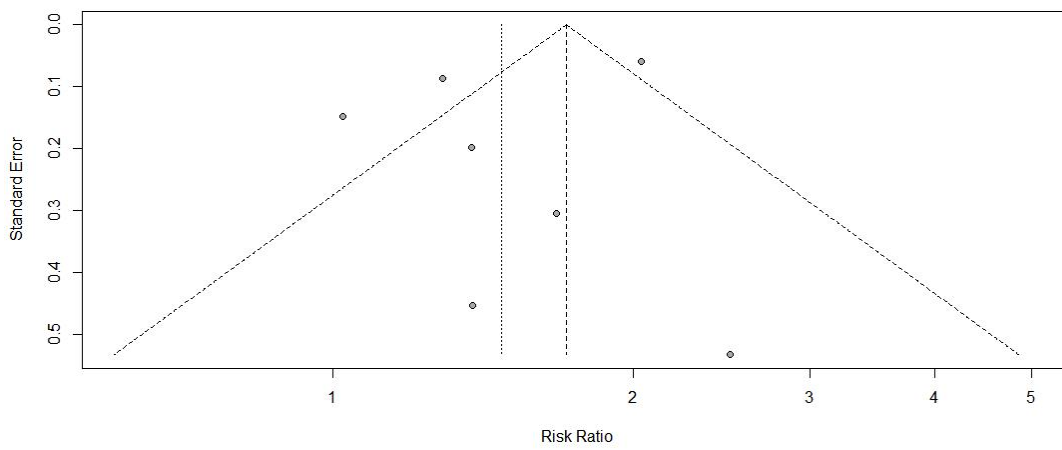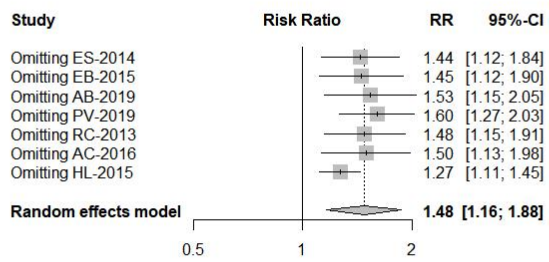

Headache:

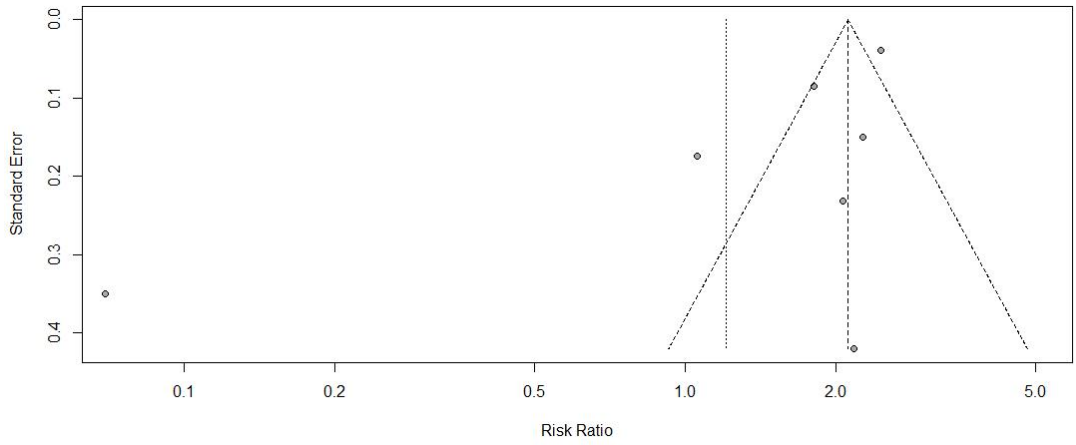

| Study                       | Risk Ratio | RR          | 95%-CI              |
|-----------------------------|------------|-------------|---------------------|
| Omitting ES-2014            |            | 1.10        | [0.38; 3.17]        |
| Omitting EB-2015            |            | 1.10        | [0.38; 3.21]        |
| Omitting AB-2019            |            | 1.12        | [0.38; 3.32]        |
| Omitting PV-2019            |            | 1.23        | [0.41; 3.67]        |
| Omitting RC-2013            |            | 1.90        | [1.46; 2.47]        |
| Omitting AC-2016            |            | 1.08        | [0.37; 3.14]        |
| Omitting HL-2015            |            | 1.06        | [0.37; 3.07]        |
| <b>Random effects model</b> |            | <b>1.21</b> | <b>[0.48; 3.02]</b> |

### Serious adverse events

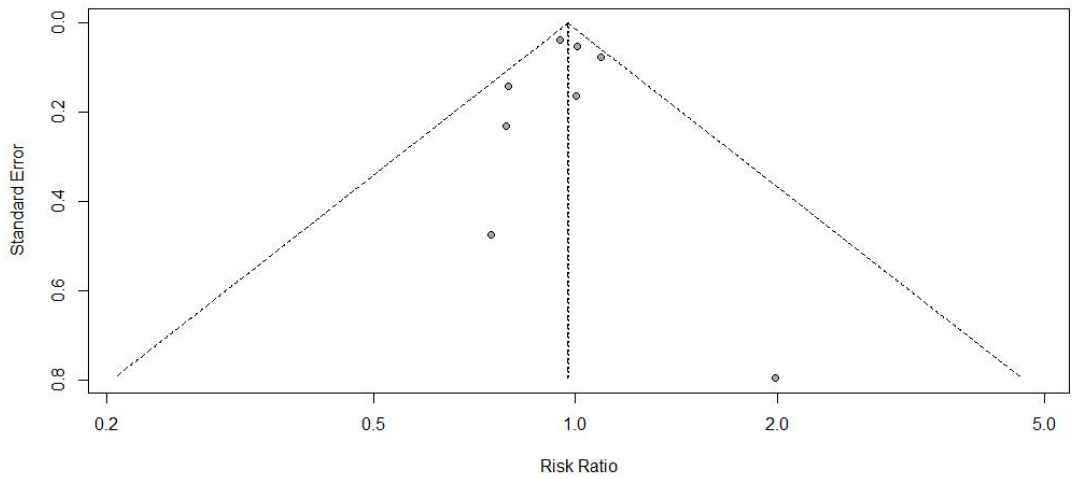

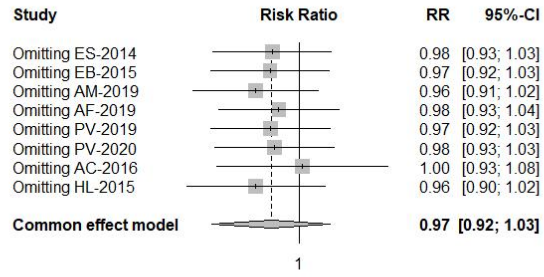

## Death

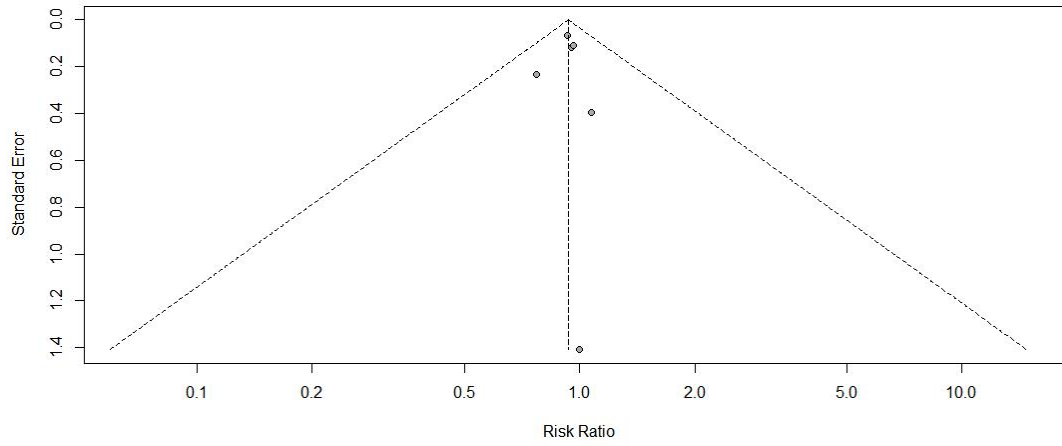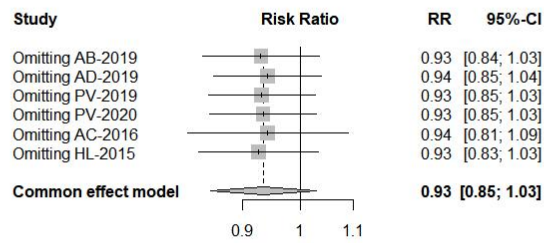

## ZVL Injection sites

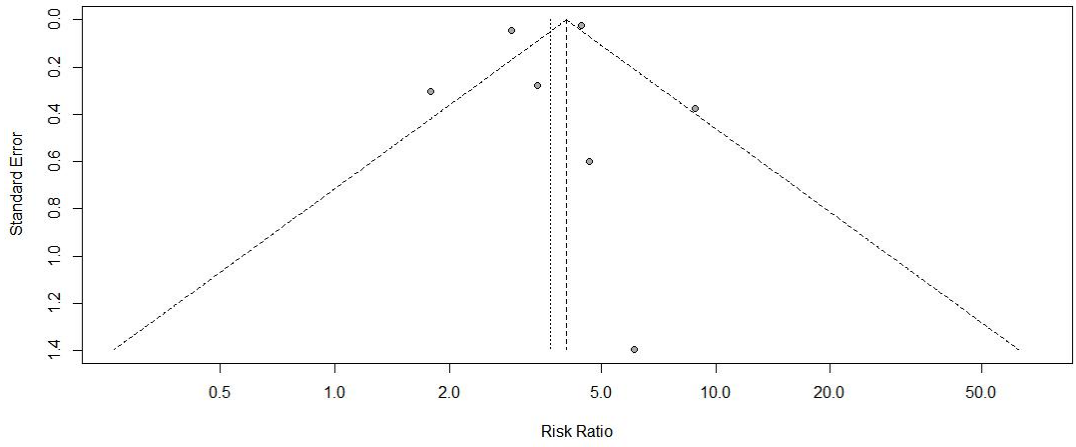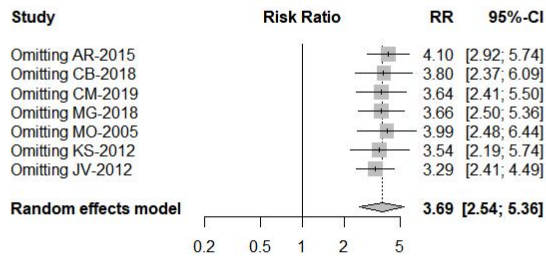

### Systemic adverse events

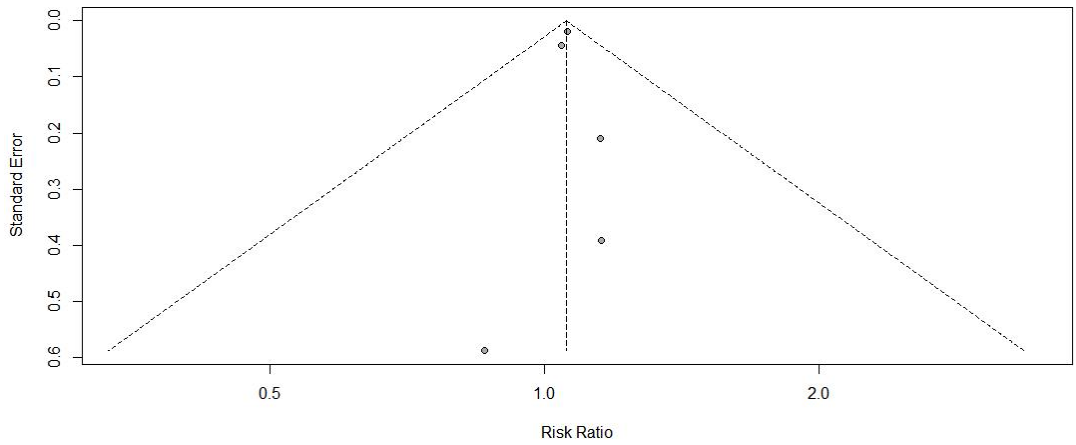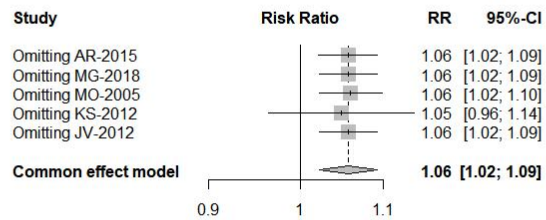

### Serious adverse events

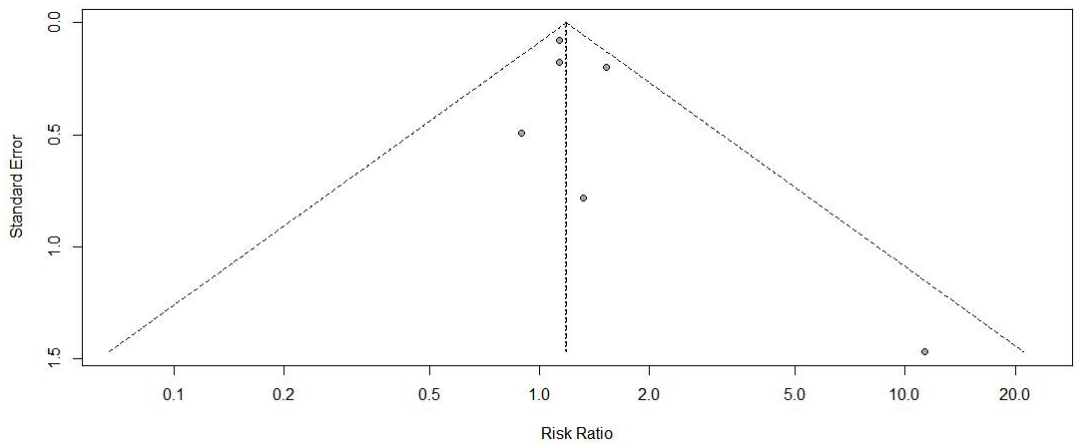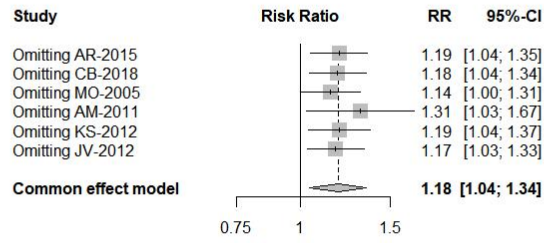

### Death

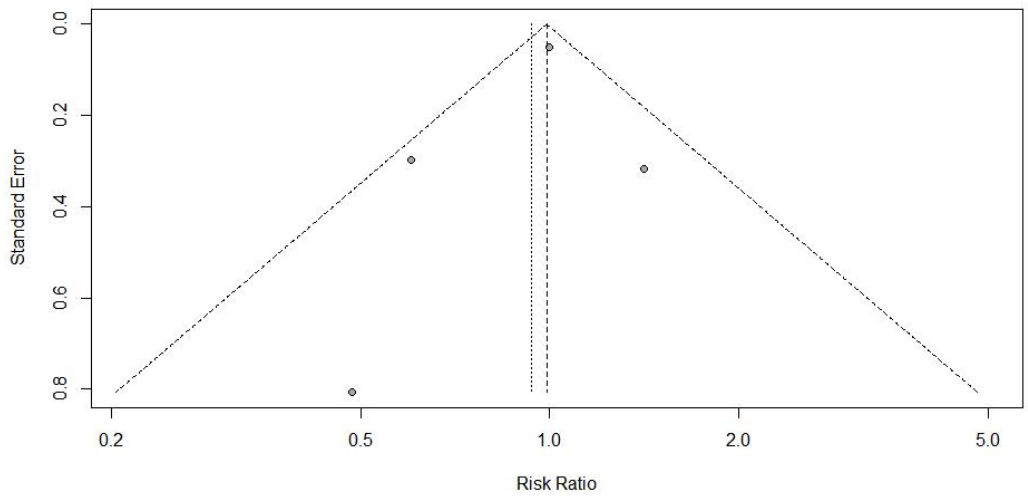

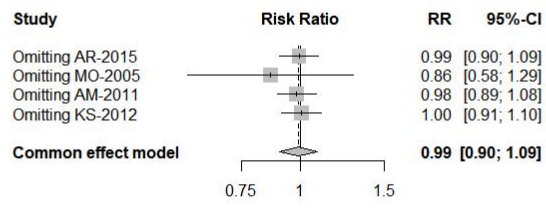



## Appendix S9: Forest plot of RZV vaccine efficacy by age subgroup.

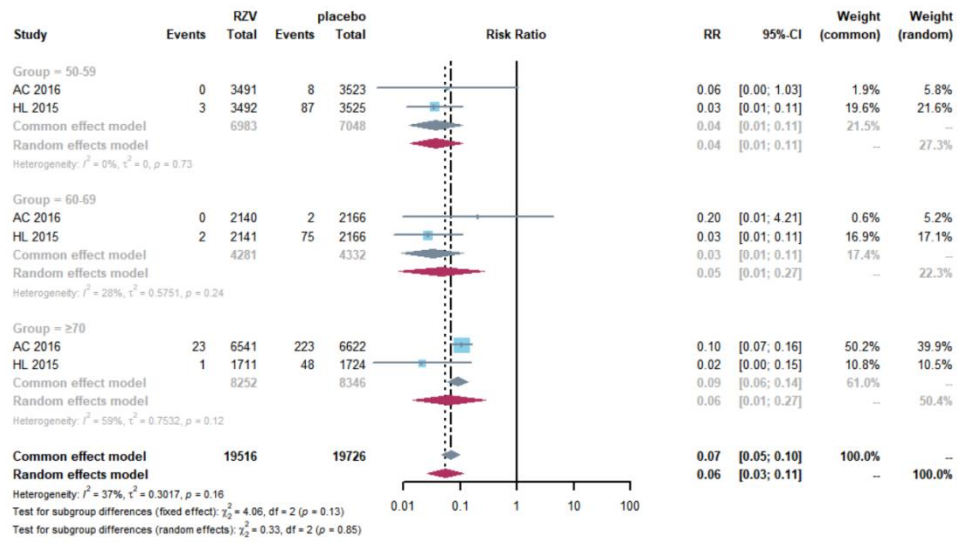

**Appendix S10: Forest plot of ZVL vaccine effectiveness by age subgroup.**

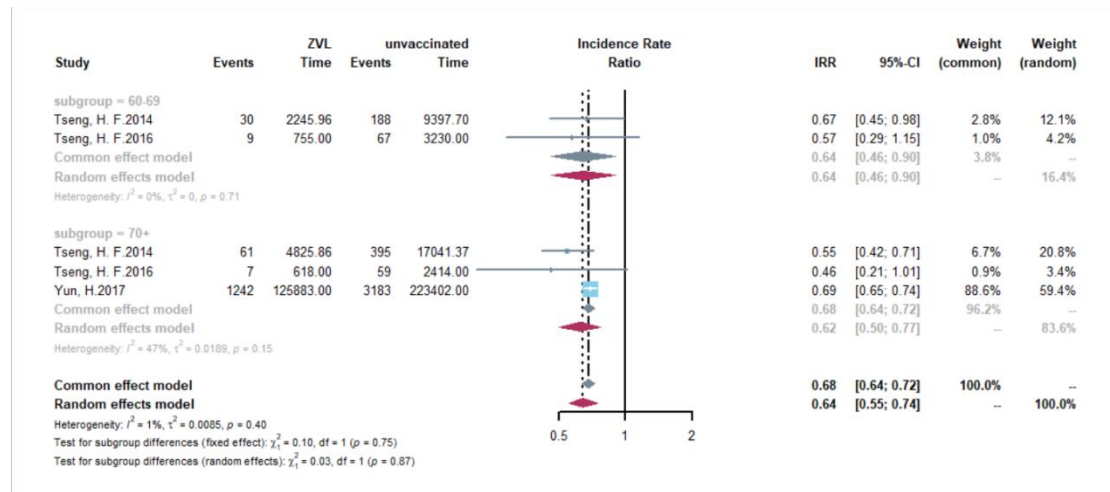

**Appendix S11: Forest plot of RZV vaccine effectiveness for prevention of HZO.**

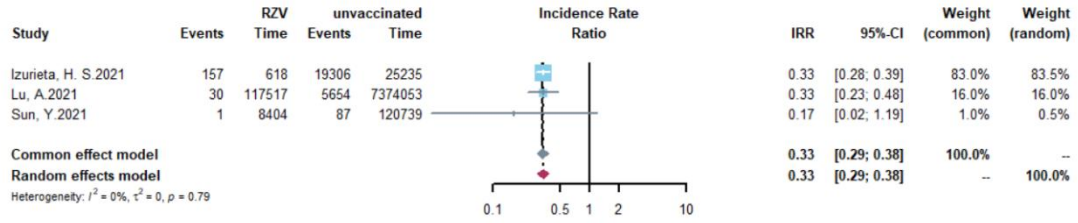

## Appendix S12: Safety outcomes of RZV.

### Injection sites

#### Redness:

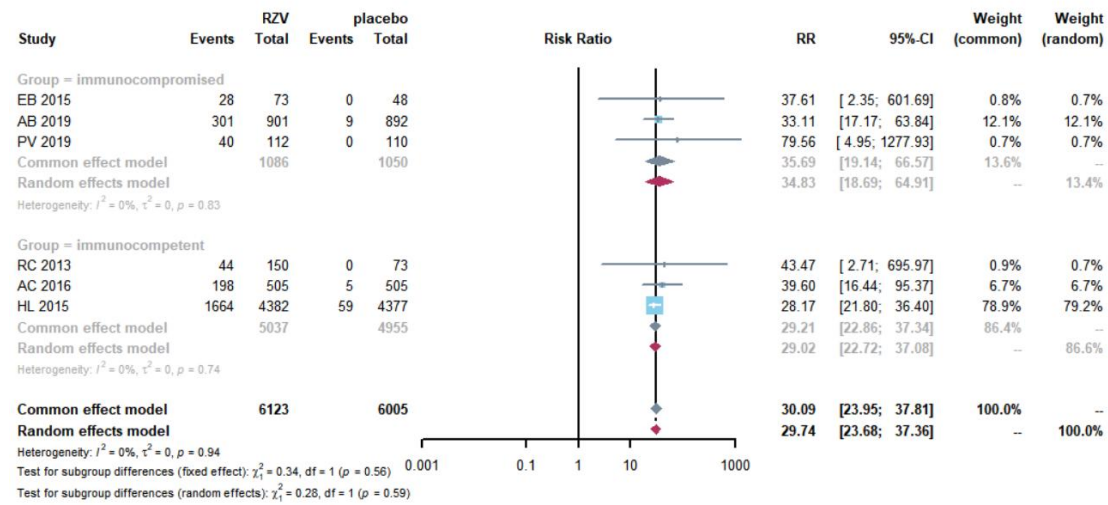

#### Swelling:

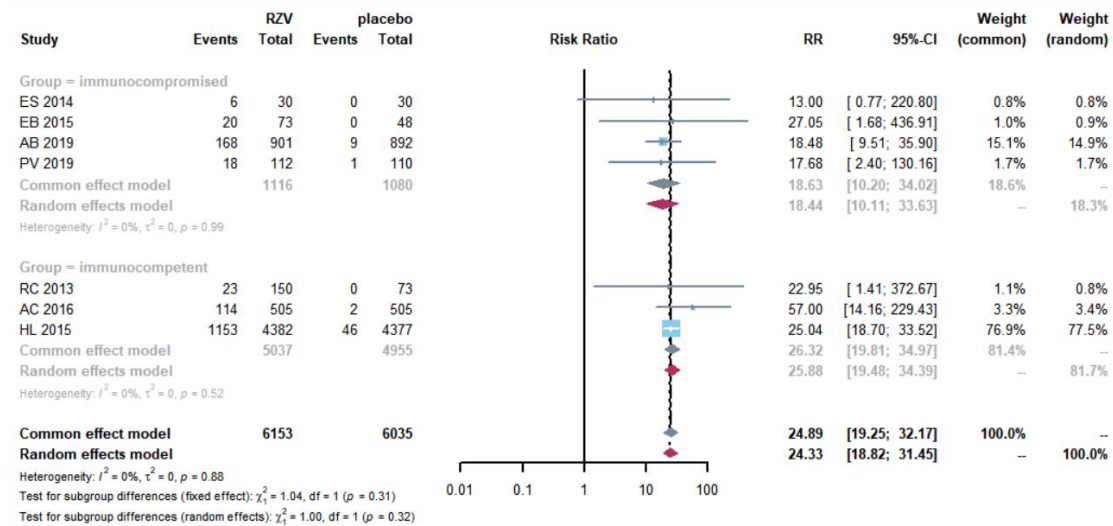

#### Pain:

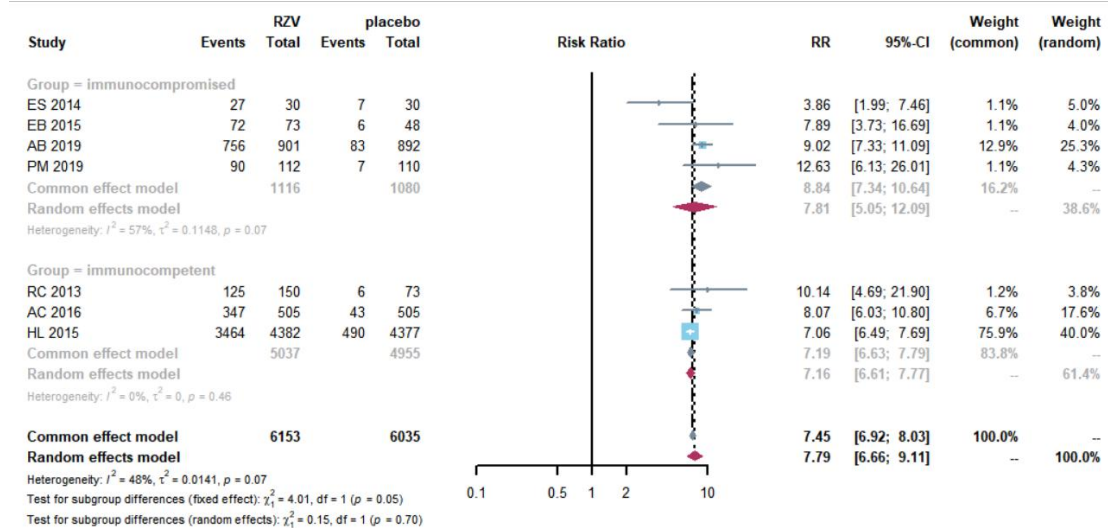

### Systemic adverse events

#### Fatigue:

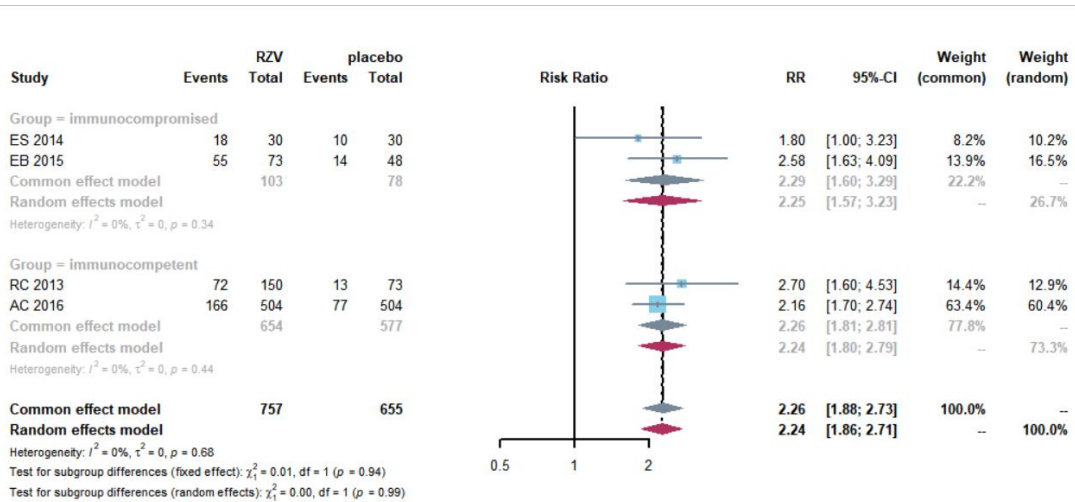

### Myalgia:

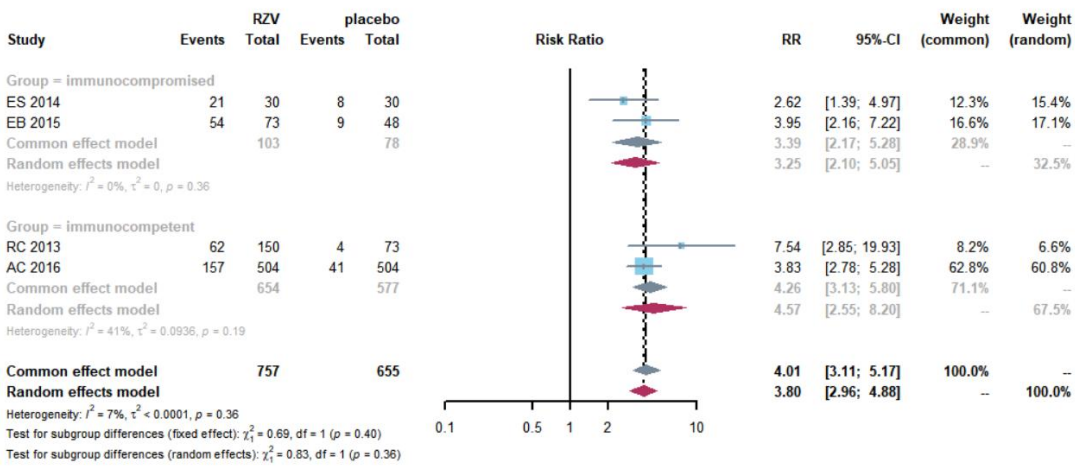

### Headache:

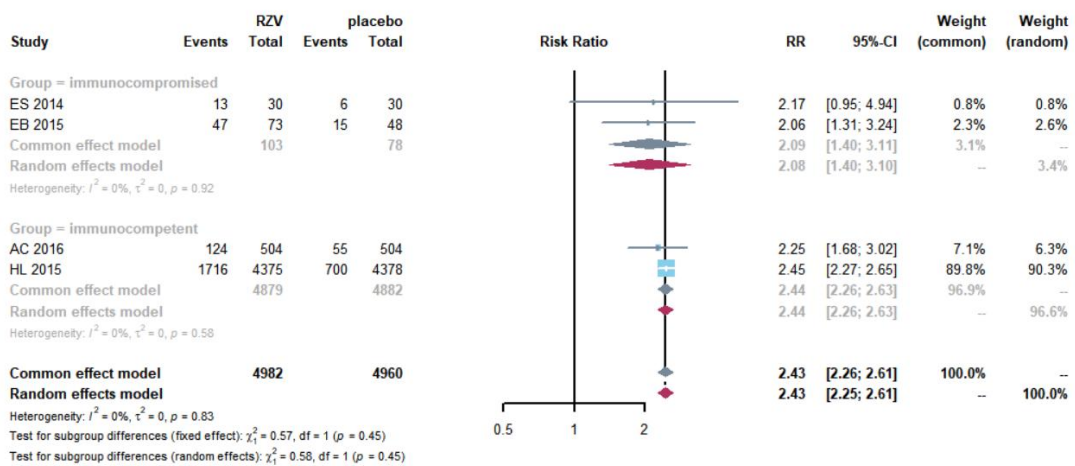

### Gastrointestinal symptoms:

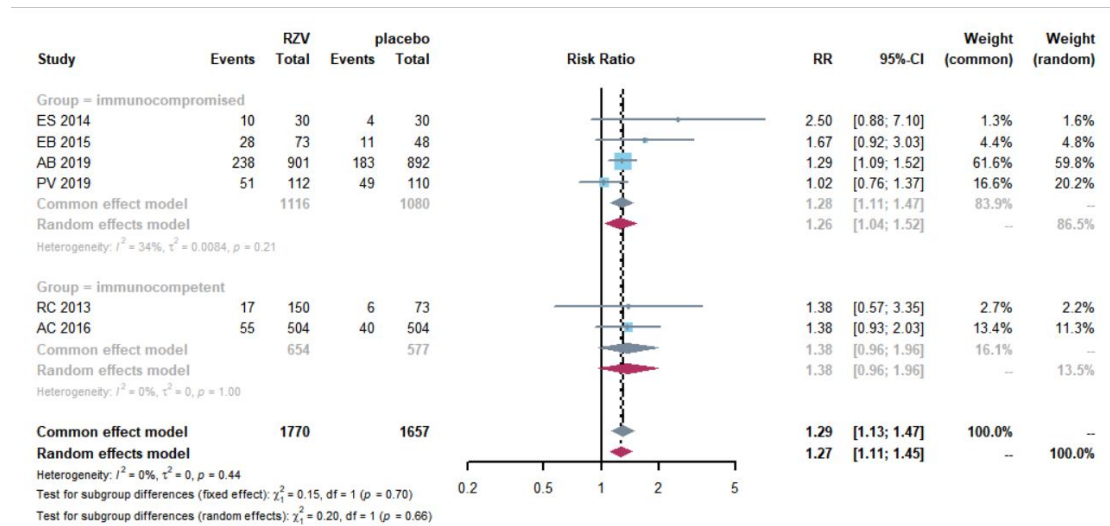

### Serious adverse events

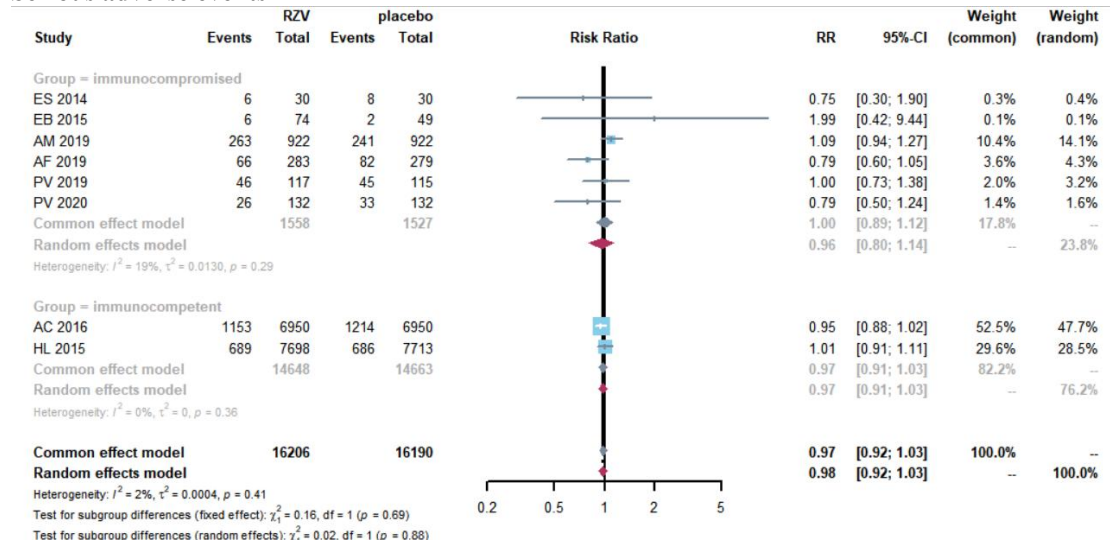

### Death

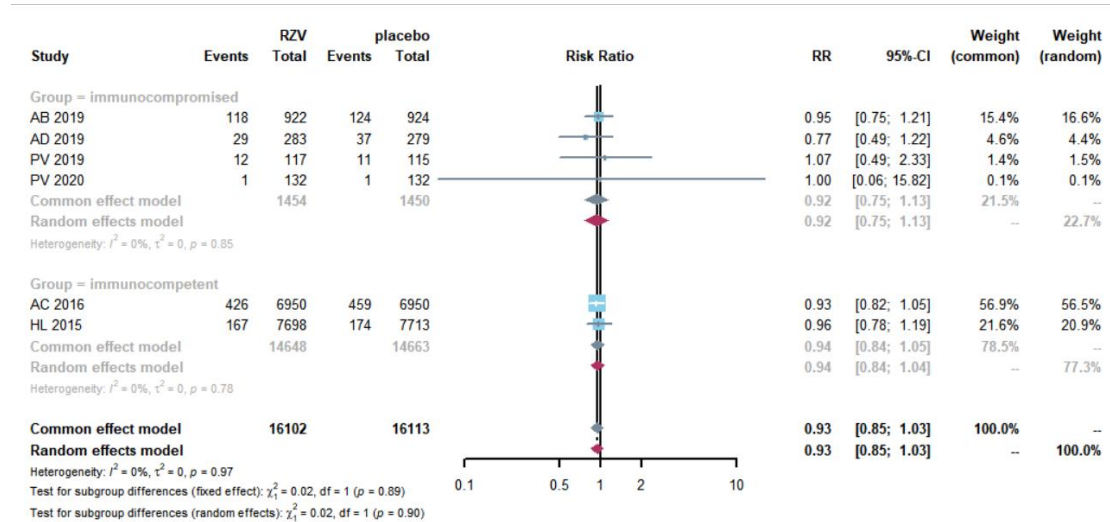

# Appendix S13: Safety outcomes of ZVL.

## Injection sites

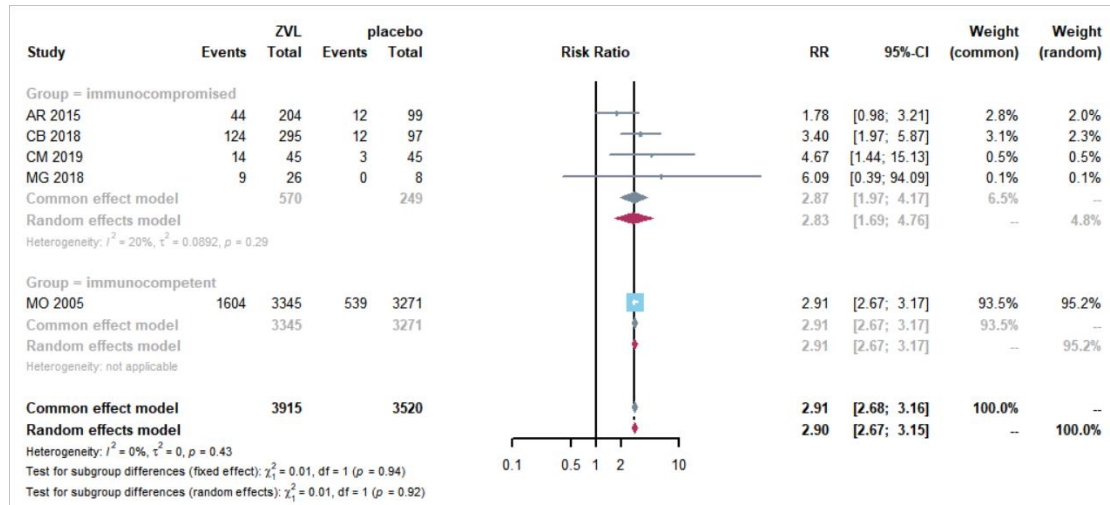

## Systemic adverse events

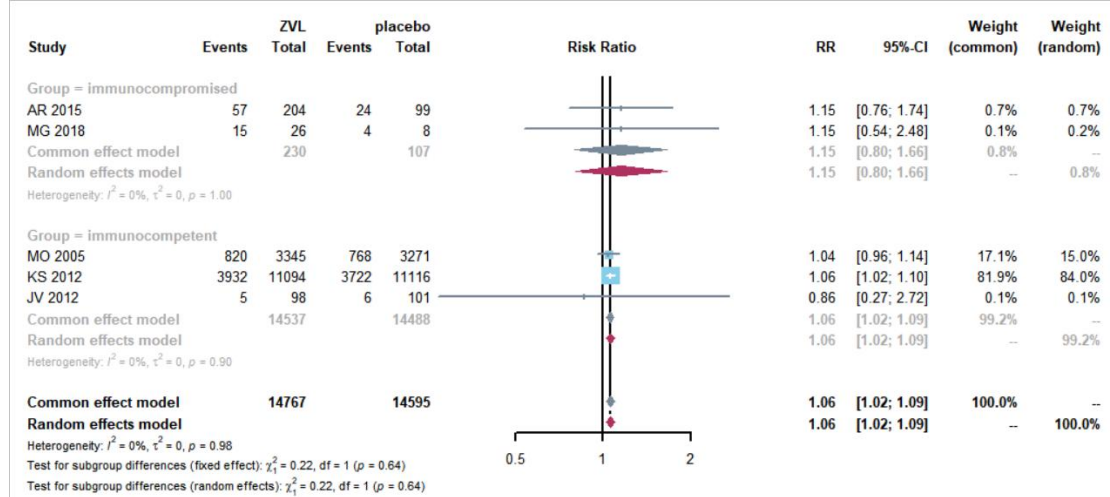

## Serious adverse events

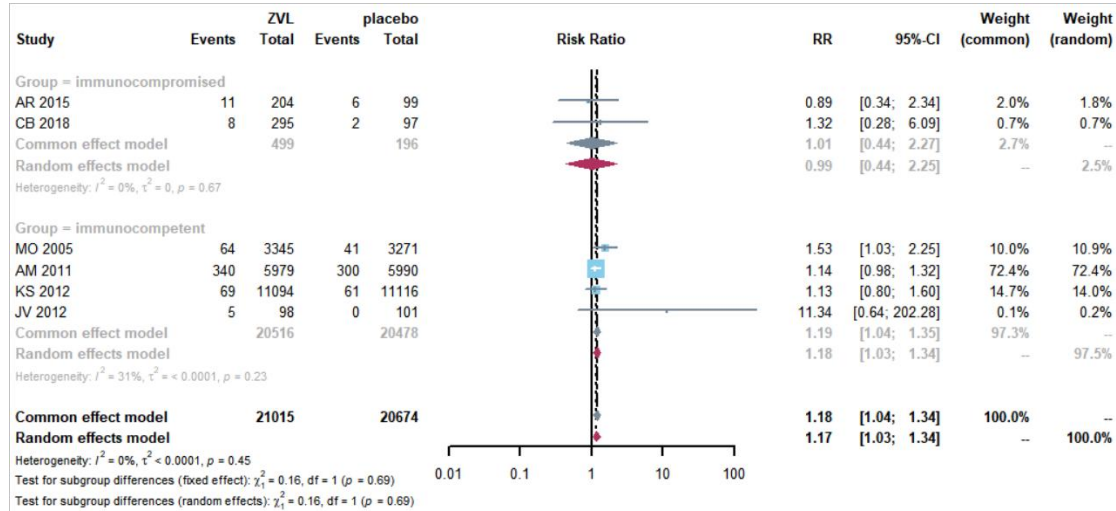

## Death

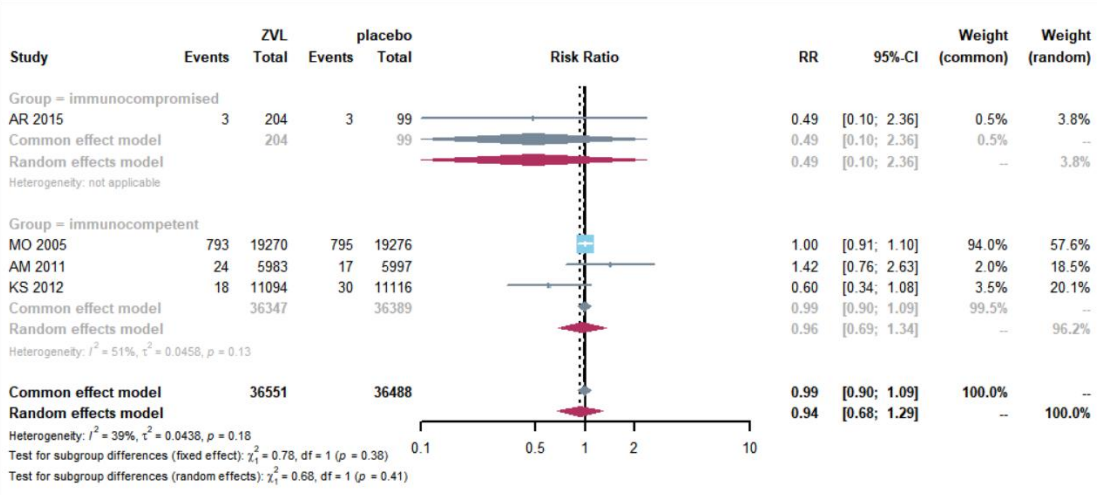

Supplement: DataSheet_1.pdf [file DataSheet_1.pdf]
